# Supplementary material
Source: PubMed Central journal article supplement (PMC4833076)
Supplement: supp_msv091_TableS1.pdf [file supp_msv091_TableS1.pdf]

Table S1. Observed numbers of convergent and parallel sites and the corresponding numbers expected under various neutral models of amino acid substitution. Results presented are for the two exterior branches leading to *D. yakuba* and *D. melanogaster*, respectively, in Fig. 2A.

| Type of sites    | Number of sites examined | Observed number of sites | Expected number of sites |                 | $R^a$ | P-value <sup>b</sup> |
|------------------|--------------------------|--------------------------|--------------------------|-----------------|-------|----------------------|
|                  |                          |                          | Substitution model       | Number of sites |       |                      |
| Convergent sites |                          |                          |                          |                 |       |                      |
|                  | 2,028,428                | 12                       | JTT- $f_{\text{gene}}$   | 4.1             | 2.93  | 0.0011               |
|                  | 2,028,428                | 12                       | JTT- $f_{\text{site}}$   | 12.1            | 0.99  | 0.56                 |
|                  | 780,615                  | 2                        | JTT-CAT                  | 3.5             | 0.57  | 0.32                 |
| Parallel sites   |                          |                          |                          |                 |       |                      |
|                  | 2,028,428                | 479                      | JTT- $f_{\text{gene}}$   | 128.9           | 3.72  | 1.7E-123             |
|                  | 2,028,428                | 479                      | JTT- $f_{\text{site}}$   | 620.6           | 0.77  | 1.9E-09              |
|                  | 780,615                  | 142                      | JTT-CAT                  | 73.1            | 1.94  | 6.4E-13              |

<sup>a</sup>Ratio between the observed number and expected number.

<sup>b</sup>A statistical test is conducted under the assumption that the number of convergent (or parallel) sites follows a Poisson distribution with the mean equal to the expected number. When the observed number is smaller than the expected, the lower tail probability is given; when the observed number is larger than the expected, the upper tail probability is given.
